# Supplementary material for: Radiological Evaluation of the Initial Fixation between Cortical Bone Trajectory and Conventional Pedicle Screw Technique for Lumbar Degenerative Spondylolisthesis
Source: PubMed Central journal article supplement — Asian Spine J. 2016 Apr 15;10(2):251–7. doi: 10.4184/asj.2016.10.2.251 (PMC4843061; doi:10.4184/asj.2016.10.2.251), 2016-04-15
Supplement: asj-10-251-s001.pdf [file asj-10-251-s001.pdf]

**Supplementary Table1.** % slip change

| Patient | Level | Pre-OP | Post-OP | 6 mo | 1 yr |
|---------|-------|--------|---------|------|------|
| CBT     |       |        |         |      |      |
| 1       | L4/5  | 9.1    | 0       | 0    | 0    |
| 2       | L4/5  | 10.0   | 0       | -    | -    |
| 3       | L4/5  | 5.6    | 0       | 4.5  | 4.5  |
| 4       | L4/5  | 15.8   | 0       | 0    | 0    |
| 5       | L3/4  | 5.6    | 0       | 0    | 0    |
| 6       | L4/5  | 5.0    | 0       | 0    | 0    |
| 7       | L4/5  | 25.0   | 13.3    | 13.3 | 13.3 |
| 8       | L4/5  | 8.7    | 0       | 0    | 0    |
| 9       | L4/5  | 16.7   | 9.1     | 9.1  | 9.1  |
| 10      | L4/5  | 10.5   | 0       | 5.3  | 5.3  |
| 11      | L4/5  | 10.0   | 0       | 0    | 0    |
| PS      |       |        |         |      |      |
| 1       | L3/4  | 16.7   | 8.3     | 8.3  | 8.3  |
| 2       | L3/4  | 11.1   | 6.7     | 5.6  | 5.6  |
| 3       | L4/5  | 16.7   | 0       | 0    | 0    |
| 4       | L4/5  | 31.3   | 12.5    | 12.5 | 18.8 |
| 5       | L4/5  | 16.7   | 6.7     | 6.7  | 12.5 |
| 6       | L4/5  | 5.6    | 0       | 0    | 0    |
| 7       | L4/5  | 5.0    | 0       | 0    | 0    |
| 8       | L4/5  | 5.0    | 0       | 0    | 0    |
| 9       | L4/5  | 9.5    | 0       | 4.8  | 4.8  |
| 10      | L4/5  | 10.0   | 0       | 0    | 0    |

Pre-OP, preoperative; Post-OP, postoperative; CBT, cortical bone trajectory; PS, pedicle screws.
