# Supplementary material for: Radiological Evaluation of the Initial Fixation between Cortical Bone Trajectory and Conventional Pedicle Screw Technique for Lumbar Degenerative Spondylolisthesis
Source: PubMed Central journal article supplement — Asian Spine J. 2016 Apr 15;10(2):251–7. doi: 10.4184/asj.2016.10.2.251 (PMC4843061; doi:10.4184/asj.2016.10.2.251), 2016-04-15
Supplement: asj-10-251-s002.pdf [file asj-10-251-s002.pdf]

**Supplementary Table 2.** Lumbar lordosis change (°)

| Pt  | Level | Pre-OP | Post-OP | 6 mo | 1 yr |
|-----|-------|--------|---------|------|------|
| CBT |       |        |         |      |      |
| 1   | L4/5  | 20     | 18      | 18   | 18   |
| 2   | L4/5  | 36     | 25      | -    | -    |
| 3   | L4/5  | 32     | 36      | 39   | 35   |
| 4   | L4/5  | 20     | 24      | 30   | 20   |
| 5   | L3/4  | 20     | 15      | 7    | 15   |
| 6   | L4/5  | 19     | 26      | 27   | 23   |
| 7   | L4/5  | 25     | 22      | 28   | 30   |
| 8   | L4/5  | 10     | 12      | 11   | 13   |
| 9   | L4/5  | 30     | 31      | 29   | 34   |
| 10  | L4/5  | 24     | 27      | 28   | 25   |
| 11  | L4/5  | 29     | 27      | 27   | 27   |
| PS  |       |        |         |      |      |
| 1   | L3/4  | 27     | 21      | 25   | 25   |
| 2   | L3/4  | 24     | 27      | 25   | 25   |
| 3   | L4/5  | 25     | 37      | 34   | 34   |
| 4   | L4/5  | 46     | 53      | 48   | 53   |
| 5   | L4/5  | 2      | 12      | 12   | 15   |
| 6   | L4/5  | 25     | 18      | 17   | 17   |
| 7   | L4/5  | 19     | 15      | 16   | 22   |
| 8   | L4/5  | 20     | 24      | 21   | 26   |
| 9   | L4/5  | 34     | 19      | 46   | 52   |
| 10  | L4/5  | 24     | 18      | 30   | 26   |

Pre-OP, preoperative; Post-OP, postoperative; CBT, cortical bone trajectory; PS, pedicle screws.
